# Supplementary material for: Consumption of Sprouts and Perceptions of Their Health Properties in a Region of Northwestern Mexico
Source: Foods. 2021 Dec 14;10(12):3098. doi: 10.3390/foods10123098 (PMC8701714; doi:10.3390/foods10123098)
Supplement: Supplementary file 1 [file foods-10-03098-s001.zip › foods-1439452-supplementary.pdf]

**Table S1.** Survey on sociodemographic profile, health status, knowledge and perception of sprouts in adult population from Northwestern Mexico

| I. Sociodemographic profile                                                                                                                                                                                                                                      |
|------------------------------------------------------------------------------------------------------------------------------------------------------------------------------------------------------------------------------------------------------------------|
| <p>1. What is your gender?</p> <ul style="list-style-type: none"> <li>a. Female</li> <li>b. Male</li> </ul>                                                                                                                                                      |
| <p>2. What is your age range?</p> <ul style="list-style-type: none"> <li>a. 18–28</li> <li>b. 29–39</li> <li>c. 40–50</li> <li>d. 51–60</li> </ul>                                                                                                               |
| <p>3. What is your education level?</p> <ul style="list-style-type: none"> <li>a. High school</li> <li>b. University education</li> <li>c. Postgraduate</li> </ul>                                                                                               |
| <p>4. What is your current occupation?</p> <ul style="list-style-type: none"> <li>a. Stay at home</li> <li>b. Full-time work</li> <li>c. Part-time work</li> <li>d. Student</li> <li>e. Self-employment</li> </ul>                                               |
| <p>5. What is your personal monthly income (MXN) range?</p> <ul style="list-style-type: none"> <li>a. No salary</li> <li>b. Less than 5,000</li> <li>c. 5,000–15,000</li> <li>d. 16,000–25,000</li> <li>e. 26,000–35,000</li> <li>f. More than 35,000</li> </ul> |
| <p>6. How many days a week are you physically active?</p> <ul style="list-style-type: none"> <li>a. 5–7</li> <li>b. 3–5</li> <li>c. 1–3</li> <li>d. None</li> </ul>                                                                                              |
| <p>7. Do you suffer, or did you suffer from any of these diseases?</p>                                                                                                                                                                                           |

- a. Diabetes
- b. Hypertension
- c. Obesity/Overweight
- d. Cancer
- e. Stroke
- f. Fatty liver
- g. Gynaecological problems
- h. Coronary heart disease
- a. None of the above

8. From this list, which sprouts have you seen for sale?

- a. Broccoli
- b. Alfalfa
- c. Soy
- d. Amaranth
- e. Chia
- f. Radish
- g. Mung bean
- h. Clover
- i. None

9. From this list, which sprouts have you consumed?

- a. Broccoli
- b. Alfalfa
- c. Soy
- d. Amaranth
- e. Chia
- f. Radish
- g. Mung bean
- h. Clover
- i. None

10. On a five-point Likert scale, what do you think of the following characteristics of sprouts?

"1": I like it very much, "2": I like it, "3": It is indifferent to me, "4": I dislike it, "5": I dislike it very much

- a. Flavour
- b. Texture
- c. Odour
- d. Colour
- e. Consistency

11. How often do you consume sprouts?

- a. 4–7 times a week

- b. 1–3 times a week
- c. Once a month
- d. Once every six months
- e. Once a year
- f. Never

12. To what would you attribute the beneficial effect of sprouts?

- a. Fibre
- b. Minerals
- c. Vitamins
- d. Polyphenols
- e. All of the above
- f. I don't know

13. Regular consumption of sprouts is linked to a lower likelihood of developing diseases such as diabetes, hypertension and cancer. Did you know this?

- a. Yes
- b. No

14. Regarding the previous question, would you consume or increase your consumption of sprouts to prevent these diseases?

- a. Yes
- b. No
